# Supplementary material for: The Neurospora crassa TOB Complex: Analysis of the Topology and Function of Tob38 and Tob37
Source: PubMed Central journal article supplement (PMC3182244; doi:10.1371/journal.pone.0025650), 2011-09-28

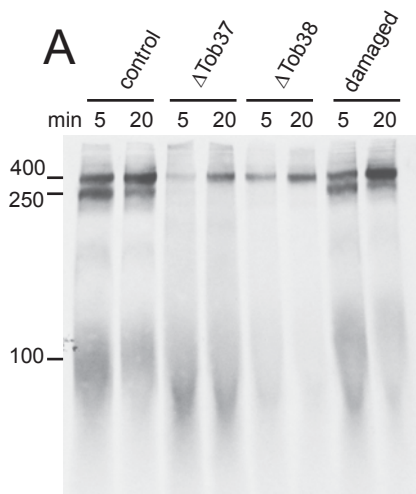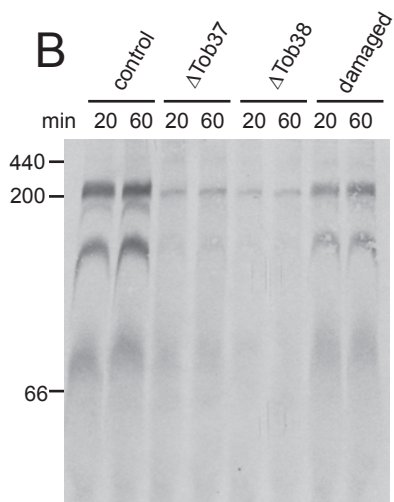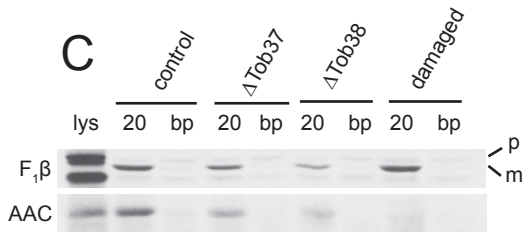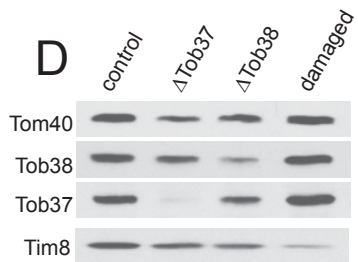

Supplement: pone.0025650.s001.pdf [file pone.0025650.s001.pdf]
